# Supplementary material for: Evaluating the Primary Prevention of Ischemic Stroke of Oral Antithrombotic Therapy in Head and Neck Cancer Patients with Radiation Therapy
Source: Hindawi journal article supplement (doi:10.1155/2016/6205158), 2016-01-01
Supplement: f1 [file 6205158.f1.pdf]

## Supplementary information

eTable 1. ICD-9-CM codes in this study

| <b>Disease</b>                               | <b>ICD-9</b> |        |        |        |        |
|----------------------------------------------|--------------|--------|--------|--------|--------|
| Head and neck cancer                         | 140          | 141    | 142    | 143    | 144    |
|                                              | 145          | 146    | 147    | 148    | 149    |
| Other cancer                                 | 150 - 239    |        |        |        |        |
| Ischemic stroke/transient<br>ischemic attack | 433          | 434    | 435    | 436    | 437    |
| Hypertension                                 | 401          | 402    | 403    | 404    | 405    |
| Diabetes mellitus                            | 250          |        |        |        |        |
| Dyslipidemia                                 | 272          |        |        |        |        |
| Chronic kidney disease                       | 585          |        |        |        |        |
| Heart failure                                | 428          |        |        |        |        |
| Atrial fibrillation                          | 427.31       |        |        |        |        |
| Gastrointestinal ulcer                       | 531          | 532    | 533    | 534    |        |
| Ischemic heart disease                       | 410          | 411    | 412    | 413    | 414    |
| Peripheral vascular disease                  | 443          |        |        |        |        |
| Major bleeding                               | 430          | 431    | 432    | 531.0  | 531.2  |
|                                              | 531.4        | 531.6  | 532.0  | 532.2  | 532.4  |
|                                              | 532.6        | 533.0  | 533.2  | 533.4  | 533.6  |
|                                              | 534.0        | 534.2  | 534.4  | 534.6  | 535.01 |
|                                              | 535.11       | 535.21 | 535.31 | 535.41 | 535.51 |
|                                              | 535.61       | 537.83 | 562.02 | 562.03 | 562.12 |
|                                              | 562.13       | 56881  | 562.12 | 569.3  | 569.85 |
| 578                                          |              |        |        |        |        |

eTable 2. Utilization of statin in study population

| Variables              | Study population      |      |                |      |         | Study population after PSM |      |                |      |         |
|------------------------|-----------------------|------|----------------|------|---------|----------------------------|------|----------------|------|---------|
|                        | Non-user (n = 36,823) |      | User (n = 815) |      |         | Non-user (n = 815)         |      | User (n = 815) |      |         |
|                        | n                     | %    | n              | %    | p-value | n                          | %    | n              | %    | p-value |
| <b>Prescribed drug</b> |                       |      |                |      |         |                            |      |                |      |         |
| Statin                 | 84                    | 0.23 | 13             | 1.60 | <.0001  | 10                         | 1.23 | 13             | 1.60 | 0.5287  |
| Atorvastatin           | 38                    | 0.10 | 8              | 0.98 | <.0001  | 7                          | 0.86 | 8              | 0.98 | 0.7953  |
| Fluvastatin            | 7                     | 0.02 | 1              | 0.12 | 0.0446  | 1                          | 0.12 | 1              | 0.12 | 1.0000  |
| Lovastatin             | 4                     | 0.01 | 1              | 0.12 | 0.0061  | 0                          | 0.00 | 1              | 0.12 | 0.3172  |
| Simvastatin            | 9                     | 0.02 | 1              | 0.12 | 0.0887  | 0                          | 0.00 | 1              | 0.12 | 0.3172  |
| Pravastatin            | 11                    | 0.03 | 1              | 0.12 | 0.1420  | 2                          | 0.25 | 1              | 0.12 | 0.5633  |
| Rosuvastatin           | 10                    | 0.03 | 1              | 0.12 | 0.1145  | 0                          | 0.00 | 1              | 0.12 | 0.3172  |
| ≥ 2 kinds of statin    | 5                     | 0.01 | 0              | 0.00 | 0.7394  | 51                         | 6.26 | 55             | 6.75 | 0.6878  |

eTable 3. The incidence of ischemic stroke and TIA in study population, stratified by method I and method II.

| Follow-up method                                                                                   | Outcome                 | Non-user      |                    |           | User          |                    |                        |
|----------------------------------------------------------------------------------------------------|-------------------------|---------------|--------------------|-----------|---------------|--------------------|------------------------|
|                                                                                                    |                         | No. of events | Total person-years | Incidence | No. of events | Total person-years | Incidence <sup>†</sup> |
| <b>Study population: non-user (n = 36,823); user (n = 815)</b>                                     |                         |               |                    |           |               |                    |                        |
| Method I                                                                                           | Ischemic stroke or TIA  | 600           | 107648.01          | 5.57      | 21            | 2034.16            | 10.32                  |
|                                                                                                    | Ischemic stroke         | 559           | 107648.01          | 5.19      | 19            | 2034.16            | 9.34                   |
|                                                                                                    | TIA                     | 26            | 107648.01          | 0.24      | 2             | 2034.16            | 0.98                   |
|                                                                                                    | Ischemic stroke and TIA | 15            | 107648.01          | 0.14      | 0             | 2034.16            | 0.00                   |
| Method II                                                                                          | Ischemic stroke or TIA  | 613           | 109023.26          | 5.62      | 2             | 318.45             | 6.28                   |
|                                                                                                    | Ischemic stroke         | 570           | 109023.26          | 5.23      | 2             | 318.45             | 6.28                   |
|                                                                                                    | TIA                     | 28            | 109023.26          | 0.26      | 0             | 318.45             | 0.00                   |
|                                                                                                    | Ischemic stroke and TIA | 15            | 109023.26          | 0.14      | 0             | 318.45             | 0.00                   |
| <b>Study population after 1-to-1 propensity score matching: non-user (n = 815); user (n = 815)</b> |                         |               |                    |           |               |                    |                        |
| Method I                                                                                           | Ischemic stroke or TIA  | 12            | 1995.20            | 6.01      | 21            | 2034.16            | 10.32                  |
|                                                                                                    | Ischemic stroke         | 11            | 1995.20            | 5.51      | 19            | 2034.16            | 9.34                   |
|                                                                                                    | TIA                     | 1             | 1995.20            | 0.50      | 2             | 2034.16            | 0.98                   |
|                                                                                                    | Ischemic stroke and TIA | 0             | 1995.20            | 0.00      | 0             | 2034.16            | 0.00                   |
| Method II                                                                                          | Ischemic stroke or TIA  | 25            | 3370.45            | 7.42      | 2             | 318.45             | 6.28                   |
|                                                                                                    | Ischemic stroke         | 22            | 3370.45            | 6.53      | 2             | 318.45             | 6.28                   |
|                                                                                                    | TIA                     | 3             | 3370.45            | 0.89      | 0             | 318.45             | 0.00                   |
|                                                                                                    | Ischemic stroke and TIA | 0             | 3370.45            | 0.00      | 0             | 318.45             | 0.00                   |
